# Supplementary material
Source: PubMed Central journal article supplement (PMC5958370)
Supplement: DS_10.1177_0022034517750141.pdf [file DS_10.1177_0022034517750141.pdf]

## **FGF8 Signaling Alters the Osteogenic Cell Fate in the Hard Palate**

J. Xu, Z. Huang, W. Wang, X. Tan, H. Li, Y. Zhang, W. Tian, T. Hu, and Y.P. Chen

### **Appendix**

#### **Supplemental Materials**

##### **Animal**

The generation and genotyping protocols of *Dmp1<sup>Cre</sup>* mice have been described previously (Lu et al. 2007).

##### **Antibody information**

Primary antibodies used in the study were: anti-Runx2 (1:300, Santa Cruz, sc-390351), anti-Sp7/Osterix (1:500, Abcam, ab22552), anti-Ki67 (1:500, Abcam, ab15580), anti-Col II (1:500, Abcam, ab34712), anti-GFP (1:500, Abcam, ab13970), anti-Sox9 (1:300, Abcam, ab3696), anti-PI3K (1:50, abcam, ab86714), anti-p-ERK1/2 (1:50, Cell Signaling, 4370S), anti-PLC $\gamma$  (1:50, Cell Signaling, 14008). Secondary antibodies, all from Life Technologies and used at 1:1000 dilution, were: goat-anti rabbit (A11008, A11037), donkey-anti mouse (A21202, A31571), goat-anti mouse (A11005), goat-anti chicken (A11039).

##### **Reference**

Lu Y, Xie Y, Zhang S, Dusevich V, Bonewald LF, Feng JQ. 2007. DMP1-targeted Cre expression in odontoblasts and osteocytes. *J Dent Res.* 86(4):320-5.

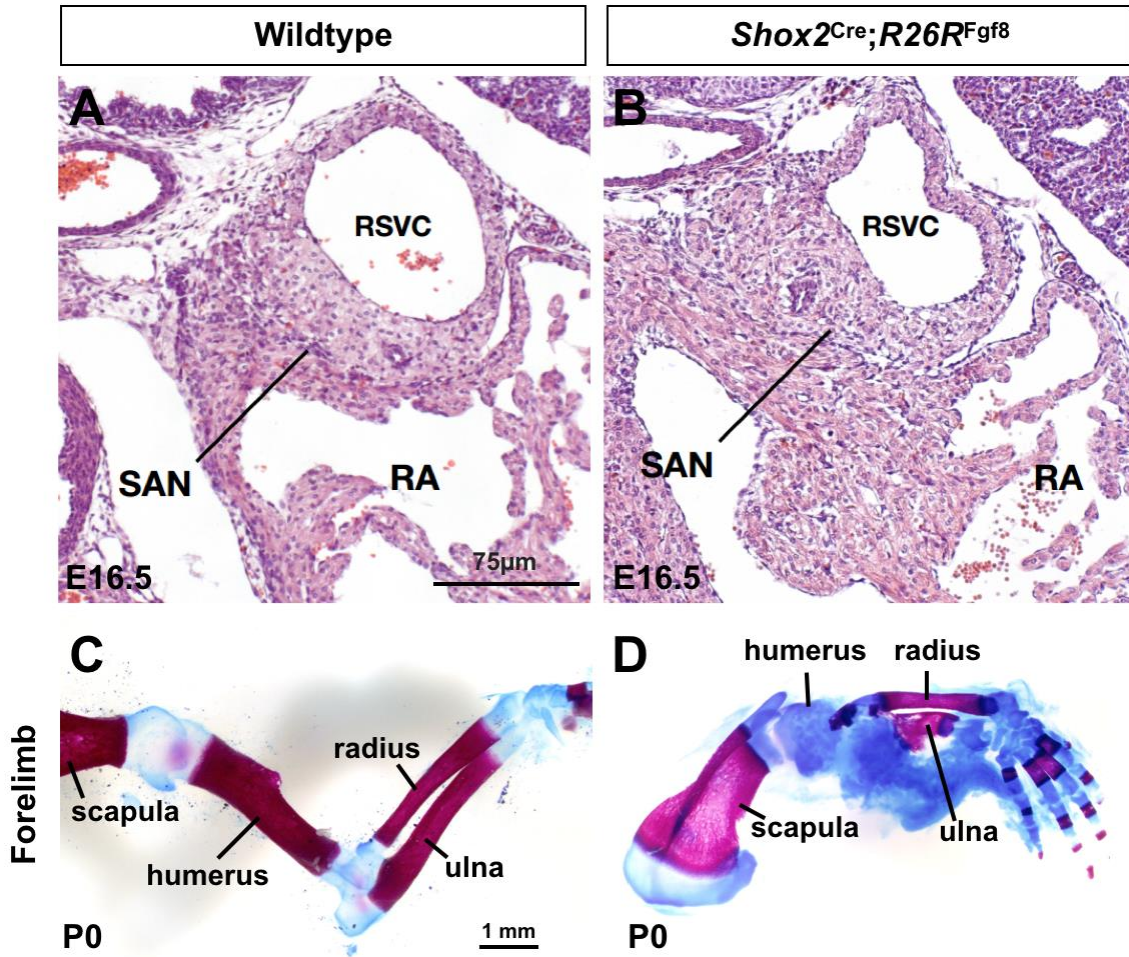

**Appendix Figure 1. Ectopic *Fgf8* activation in *Shox2*<sup>+</sup> cells leads to cardiac and limb defects**

(A, B) H&E staining on sections of E16.5 control *Shox2*<sup>Cre</sup>;*R26R*<sup>Fgf8</sup> embryonic hearts reveals hyperplastic right atrial wall immediately adjacent to the sinoatrial node in the mutant. (C, D) Al-cian Blue/Alizarin Red skeletal staining shows a virtual loss of humerus and severely truncated radius and ulna in a P0 *Shox2*<sup>Cre</sup>;*R26R*<sup>Fgf8</sup> mouse forelimb (D), as compared to the control (C). RA, right atrium; SAN, sinoatrial node, RSVC, right superior vena cava. Scale bars = 75- $\mu$ m (A, B); = 1-mm (C, D).

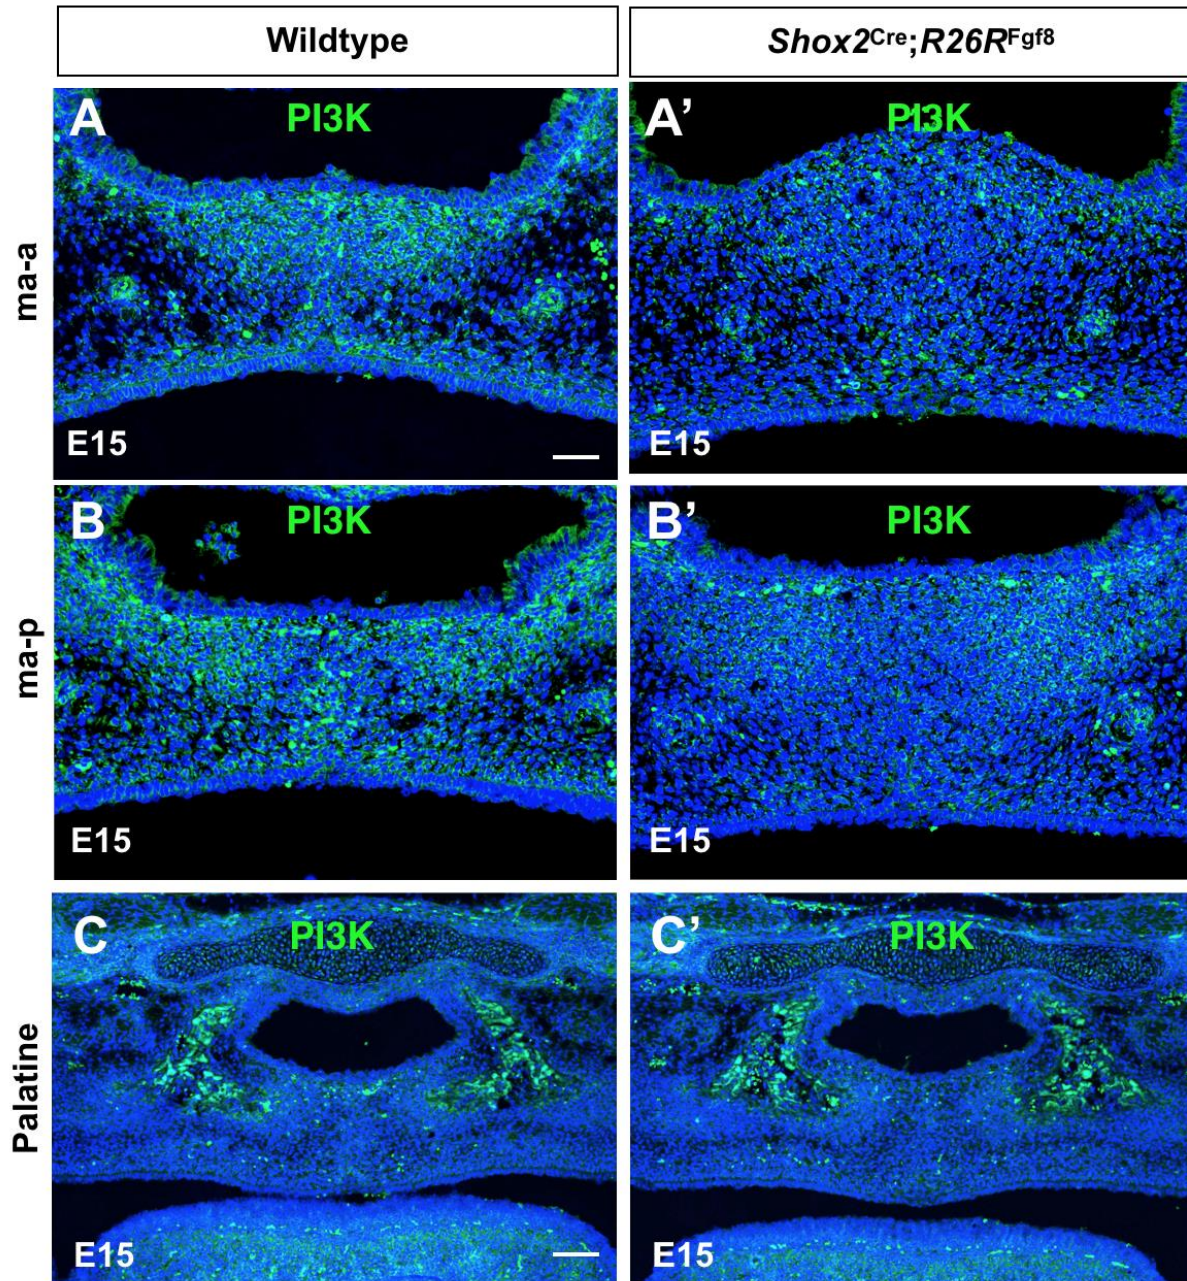

**Appendix Figure 2. Enhanced FGF8 signaling reduces PI3K levels in the future palatine process of the maxilla but not in the future palatine domain**

Immunostaining shows reduced PI3K levels in the future palatine process of the maxilla region (A' B') but not the future palatine domain (C') of an E15 *Shox2*<sup>Cre</sup>;*R26R*<sup>Fgf8</sup> palate, as compared to control (A, B, C). Scale bars = 50- $\mu$ m (A-B'), = 100- $\mu$ m (C, C').



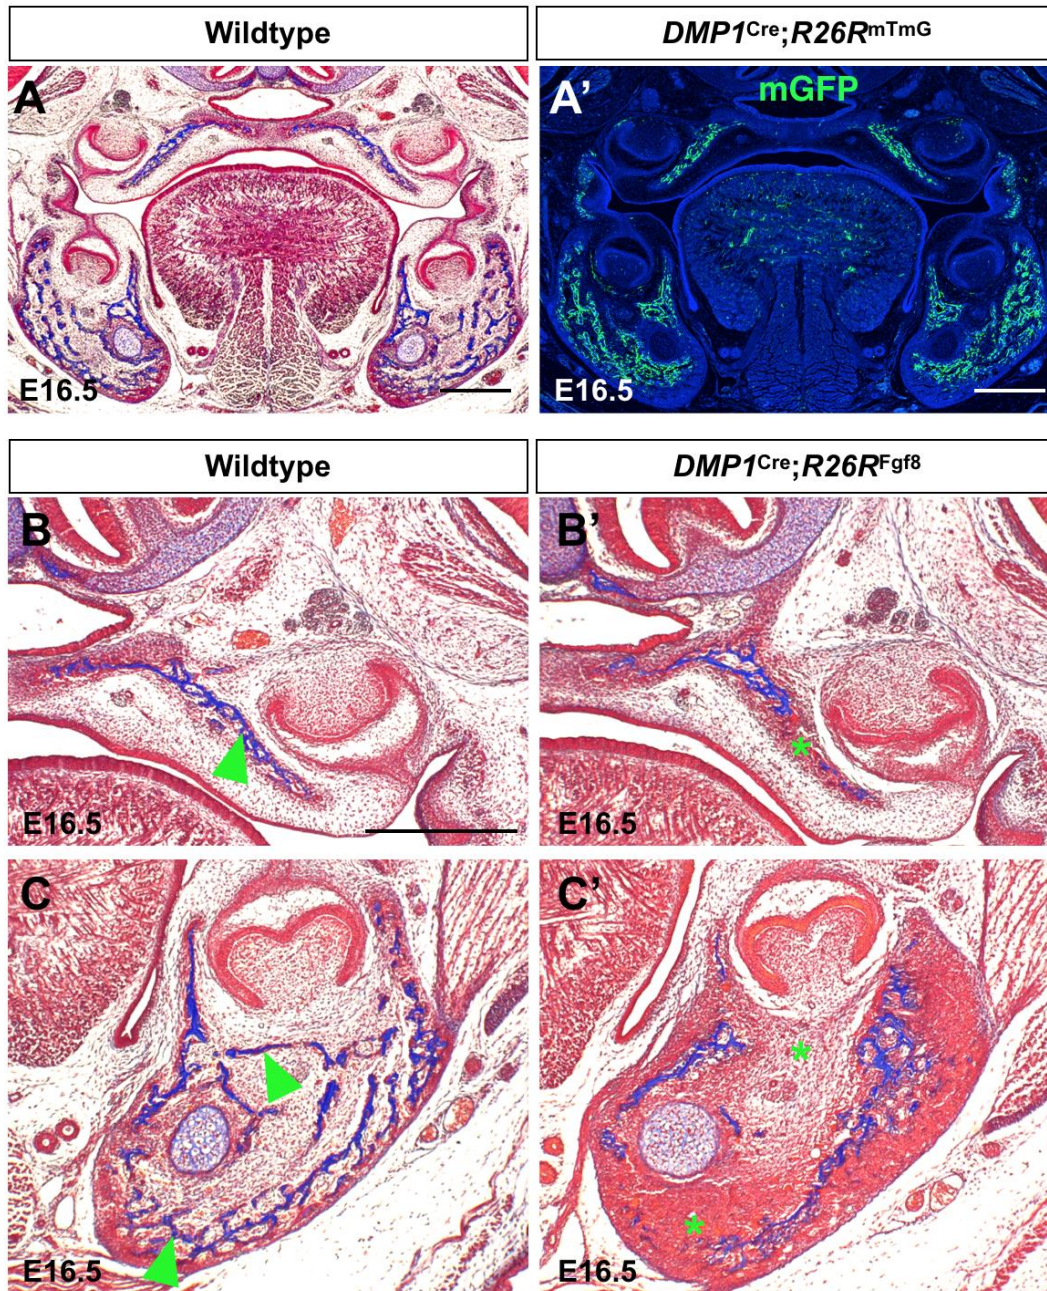

**Appendix Figure 3. *Fgf8* overexpression in *Dmp1*<sup>+</sup> cells leads to osteopenia in both the maxilla and mandible.** (A, A') Azon red/Aniline blue staining on section of E16.5 wild type craniofacial region reveals match of the forming maxilla-mandibular bones (A) with *Dmp1*<sup>+</sup> cells (marked by mGFP staining) in E16.5 *Dmp1<sup>Cre</sup>;R26R<sup>mTmG</sup>* mice (A'). (B-C') Azon red/Aniline blue staining shows osteopenia (marked by green asterisks) in both the maxillary bone and mandibular bone in E16.5 *Dmp1<sup>Cre</sup>;R26R<sup>Fgf8</sup>* mice (B' C'), as compared to controls (B, C). Scale bars = 400- $\mu$ m.

**Appendix Table. Primer sequences for qPCR.**

| <b>Gene name</b> | <b>Forward primer (5'-3')</b> | <b>Reverse primer (5'-3')</b> |
|------------------|-------------------------------|-------------------------------|
| <i>Fgf8</i>      | ATCGTGCTGGAGAACAACACTAC       | ACCCAACAGCAAACAATATGC         |
| <i>Runx2</i>     | AGGGACTATGGCGTCAAACA          | GGCTCACGTCGCTCATCTT           |
| <i>Sp7</i>       | CGCTTTGTGCCTTTGAAAT           | CCGTCAACGACGTTATGC            |
| <i>Bglap</i>     | CAGACACCATGAGGACCATC          | GGACTGAGGCTCTGTGAGGT          |
| <i>Sox9</i>      | CGGAGGAAGTCGGTGAAGA           | GTCGGTTTTGGGAGTGGTG           |
| <i>Col2a</i>     | TGGCTTCCACTTCAGCTATG          | AGGTAGGCGATGCTGTTCTT          |
| <i>Myc</i>       | GTGACCAGATCCCTGAATTG          | CTCGTCGTTTCCTCAATAAGT         |
| <i>Fgfr1</i>     | GGTGAACGGGAGTAAGATCGG         | CCCCGCATCCTCAAAGGAG           |
| <i>Fgfr2</i>     | CCTCGATGTCGTTGAACGGTC         | CAGCATCCATCTCCGTCACA          |
| <i>Fgfr3</i>     | GCCTGCGTGCTAGTGTTCT           | TACCATCCTTAGCCCAGACCG         |
| <i>Fgfr4</i>     | GCTCGGAGGTAGAGGTCTTGT         | CCACGCTGACTGGTAGGAA           |
